# Supplementary material
Source: MDPI journal article supplement (https://www.mdpi.com/2075-1702/11/2/264)
Supplement: s1 [file s1]

**Table S1.** Measured experimental data for hard milling under CCAC conditions

| Exp.<br>Number | Input variables  |                     |               |              | Output variables |              |              |            |            |
|----------------|------------------|---------------------|---------------|--------------|------------------|--------------|--------------|------------|------------|
|                | $v_c$<br>[m/min] | $f_t$<br>[mm/tooth] | $a_e$<br>[mm] | $t$<br>[min] | $F_x$<br>[N]     | $F_y$<br>[N] | $F_z$<br>[N] | VB<br>[mm] | Ra<br>[μm] |
| 1              | 70               | 0,05                | 1             | 10           | 335,31           | 789,89       | 64,36        | 0,033      | 0,20       |
| 2              | 120              | 0,05                | 1             | 10           | 299,31           | 650,45       | 68,13        | 0,042      | 0,22       |
| 3              | 70               | 0,11                | 1             | 10           | 457,74           | 1025,83      | 70,07        | 0,041      | 0,37       |
| 4              | 120              | 0,11                | 1             | 10           | 400,45           | 894,56       | 74,11        | 0,052      | 0,26       |
| 5              | 70               | 0,05                | 2             | 10           | 285,56           | 816,93       | 72,29        | 0,041      | 0,22       |
| 6              | 120              | 0,05                | 2             | 10           | 251,23           | 705,56       | 62,26        | 0,046      | 0,25       |
| 7              | 70               | 0,11                | 2             | 10           | 406,89           | 1036,99      | 79,56        | 0,036      | 0,33       |
| 8              | 120              | 0,11                | 2             | 10           | 360,51           | 903,51       | 75,59        | 0,046      | 0,20       |
| 9              | 70               | 0,05                | 1             | 22           | 326,56           | 845,65       | 68,12        | 0,059      | 0,33       |
| 10             | 120              | 0,05                | 1             | 22           | 365,56           | 704,56       | 74,19        | 0,065      | 0,41       |
| 11             | 70               | 0,11                | 1             | 22           | 490,45           | 1123,12      | 83,64        | 0,073      | 0,46       |
| 12             | 120              | 0,11                | 1             | 22           | 456,85           | 975,65       | 82,80        | 0,089      | 0,38       |
| 13             | 70               | 0,05                | 2             | 22           | 340,23           | 905,62       | 89,67        | 0,056      | 0,26       |
| 14             | 120              | 0,05                | 2             | 22           | 334,45           | 845,56       | 83,07        | 0,067      | 0,32       |
| 15             | 70               | 0,11                | 2             | 22           | 459,69           | 1055,10      | 103,56       | 0,064      | 0,31       |
| 16             | 120              | 0,11                | 2             | 22           | 424,92           | 975,65       | 101,45       | 0,082      | 0,23       |
| 17             | 45               | 0,08                | 1,5           | 16           | 380,15           | 1001,89      | 68,45        | 0,043      | 0,32       |
| 18             | 145              | 0,08                | 1,5           | 16           | 330,16           | 734,56       | 70,45        | 0,072      | 0,26       |
| 19             | 95               | 0,02                | 1,5           | 16           | 280,56           | 480,65       | 61,53        | 0,068      | 0,29       |
| 20             | 95               | 0,14                | 1,5           | 16           | 500,12           | 910,46       | 90,48        | 0,095      | 0,39       |
| 21             | 95               | 0,08                | 0,5           | 16           | 401,23           | 945,93       | 68,95        | 0,043      | 0,29       |
| 22             | 95               | 0,08                | 2,5           | 16           | 338,56           | 1056,45      | 88,31        | 0,036      | 0,17       |
| 23             | 95               | 0,08                | 1,5           | 4            | 316,56           | 922,47       | 76,58        | 0,020      | 0,25       |
| 24             | 95               | 0,08                | 1,5           | 28           | 463,16           | 1103,10      | 109,65       | 0,074      | 0,42       |
| 25             | 95               | 0,08                | 1,5           | 16           | 370,15           | 999,26       | 83,39        | 0,048      | 0,21       |
| 26             | 95               | 0,08                | 1,5           | 16           | 350,12           | 1015,74      | 85,45        | 0,045      | 0,21       |
| 27             | 95               | 0,08                | 1,5           | 16           | 356,21           | 1002,54      | 81,25        | 0,047      | 0,23       |
| 28             | 95               | 0,08                | 1,5           | 16           | 361,56           | 1030,52      | 87,64        | 0,043      | 0,22       |
| 29             | 95               | 0,08                | 1,5           | 16           | 356,55           | 1003,91      | 84,12        | 0,046      | 0,24       |
| 30             | 95               | 0,08                | 1,5           | 16           | 367,56           | 1016,56      | 80,69        | 0,045      | 0,20       |

**Table S2.** Measured experimental data for hard milling under CFs conditions

| Exp.<br>Number | Input variables  |                     |               |              | Output variables |              |              |              |              |
|----------------|------------------|---------------------|---------------|--------------|------------------|--------------|--------------|--------------|--------------|
|                | $v_c$<br>[m/min] | $f_t$<br>[mm/tooth] | $a_e$<br>[mm] | $t$<br>[min] | $F_x$<br>[N]     | $F_y$<br>[N] | $F_z$<br>[N] | $VB$<br>[mm] | $Ra$<br>[μm] |
| 1              | 70               | 0,05                | 1             | 10           | 356,23           | 833,64       | 69,45        | 0,146        | 0,29         |
| 2              | 120              | 0,05                | 1             | 10           | 337,96           | 590,23       | 72,84        | 0,139        | 0,35         |
| 3              | 70               | 0,11                | 1             | 10           | 487,65           | 1101,55      | 76,56        | 0,134        | 0,37         |
| 4              | 120              | 0,11                | 1             | 10           | 480,56           | 943,56       | 80,76        | 0,155        | 0,29         |
| 5              | 70               | 0,05                | 2             | 10           | 345,56           | 843,55       | 80,45        | 0,162        | 0,30         |
| 6              | 120              | 0,05                | 2             | 10           | 309,19           | 745,89       | 70,45        | 0,141        | 0,27         |
| 7              | 70               | 0,11                | 2             | 10           | 461,56           | 1105,65      | 85,46        | 0,148        | 0,41         |
| 8              | 120              | 0,11                | 2             | 10           | 361,04           | 986,44       | 81,45        | 0,151        | 0,24         |
| 9              | 70               | 0,05                | 1             | 22           | 394,17           | 923,54       | 69,56        | 0,182        | 0,51         |
| 10             | 120              | 0,05                | 1             | 22           | 377,58           | 801,45       | 77,41        | 0,178        | 0,62         |
| 11             | 70               | 0,11                | 1             | 22           | 598,56           | 1184,56      | 91,55        | 0,198        | 0,61         |
| 12             | 120              | 0,11                | 1             | 22           | 516,23           | 1052,87      | 87,96        | 0,253        | 0,47         |
| 13             | 70               | 0,05                | 2             | 22           | 406,09           | 985,65       | 94,65        | 0,185        | 0,45         |
| 14             | 120              | 0,05                | 2             | 22           | 365,56           | 968,65       | 90,36        | 0,175        | 0,44         |
| 15             | 70               | 0,11                | 2             | 22           | 566,02           | 1107,83      | 109,47       | 0,225        | 0,54         |
| 16             | 120              | 0,11                | 2             | 22           | 496,26           | 1054,97      | 112,27       | 0,241        | 0,35         |
| 17             | 45               | 0,08                | 1,5           | 16           | 435,23           | 1141,12      | 70,44        | 0,145        | 0,36         |
| 18             | 145              | 0,08                | 1,5           | 16           | 362,36           | 845,56       | 76,39        | 0,178        | 0,29         |
| 19             | 95               | 0,02                | 1,5           | 16           | 345,56           | 525,21       | 69,33        | 0,182        | 0,49         |
| 20             | 95               | 0,14                | 1,5           | 16           | 578,89           | 965,89       | 92,52        | 0,234        | 0,54         |
| 21             | 95               | 0,08                | 0,5           | 16           | 485,56           | 989,89       | 73,46        | 0,185        | 0,48         |
| 22             | 95               | 0,08                | 2,5           | 16           | 402,56           | 1138,19      | 94,53        | 0,191        | 0,37         |
| 23             | 95               | 0,08                | 1,5           | 4            | 356,56           | 930,12       | 77,52        | 0,087        | 0,26         |
| 24             | 95               | 0,08                | 1,5           | 28           | 501,69           | 1180,55      | 114,56       | 0,221        | 0,57         |
| 25             | 95               | 0,08                | 1,5           | 16           | 423,56           | 1101,51      | 89,96        | 0,163        | 0,28         |
| 26             | 95               | 0,08                | 1,5           | 16           | 412,59           | 1095,55      | 89,12        | 0,168        | 0,26         |
| 27             | 95               | 0,08                | 1,5           | 16           | 435,71           | 1100,44      | 86,45        | 0,159        | 0,28         |
| 28             | 95               | 0,08                | 1,5           | 16           | 422,58           | 1151,56      | 87,65        | 0,154        | 0,31         |
| 29             | 95               | 0,08                | 1,5           | 16           | 434,23           | 1008,65      | 88,32        | 0,162        | 0,30         |
| 30             | 95               | 0,08                | 1,5           | 16           | 454,63           | 1109,52      | 85,35        | 0,159        | 0,29         |

**Table S3.** Measured experimental data for hard milling under DM conditions

| Exp.<br>Number | Input variables  |                     |               |              | Output variables |              |              |              |              |
|----------------|------------------|---------------------|---------------|--------------|------------------|--------------|--------------|--------------|--------------|
|                | $v_c$<br>[m/min] | $f_t$<br>[mm/tooth] | $a_e$<br>[mm] | $t$<br>[min] | $F_x$<br>[N]     | $F_y$<br>[N] | $F_z$<br>[N] | $VB$<br>[mm] | $Ra$<br>[μm] |
| 1              | 70               | 0,05                | 1             | 10           | 327,29           | 854,98       | 64,67        | 0,05         | 0,22         |
| 2              | 120              | 0,05                | 1             | 10           | 292,46           | 703,35       | 66,88        | 0,04         | 0,27         |
| 3              | 70               | 0,11                | 1             | 10           | 457,11           | 1138,95      | 73,93        | 0,04         | 0,39         |
| 4              | 120              | 0,11                | 1             | 10           | 412,93           | 950,32       | 76,66        | 0,062        | 0,31         |
| 5              | 70               | 0,05                | 2             | 10           | 284,61           | 886,56       | 73,33        | 0,055        | 0,21         |
| 6              | 120              | 0,05                | 2             | 10           | 249,66           | 775,66       | 65,67        | 0,045        | 0,27         |
| 7              | 70               | 0,11                | 2             | 10           | 400,11           | 1098,81      | 81,24        | 0,057        | 0,38         |
| 8              | 120              | 0,11                | 2             | 10           | 364,24           | 961,84       | 77,74        | 0,0547       | 0,16         |
| 9              | 70               | 0,05                | 1             | 22           | 339,17           | 911,33       | 70,55        | 0,08         | 0,47         |
| 10             | 120              | 0,05                | 1             | 22           | 379,15           | 777,55       | 73,67        | 0,12         | 0,58         |
| 11             | 70               | 0,11                | 1             | 22           | 472,68           | 1197,16      | 92,22        | 0,13         | 0,59         |
| 12             | 120              | 0,11                | 1             | 22           | 466,59           | 1029,92      | 85           | 0,15         | 0,45         |
| 13             | 70               | 0,05                | 2             | 22           | 342,15           | 982,37       | 96,28        | 0,075        | 0,33         |
| 14             | 120              | 0,05                | 2             | 22           | 340,59           | 901,54       | 88,73        | 0,08         | 0,41         |
| 15             | 70               | 0,11                | 2             | 22           | 450,26           | 1168,54      | 114,16       | 0,1085       | 0,36         |
| 16             | 120              | 0,11                | 2             | 22           | 443,121          | 1050,24      | 107,538      | 0,128        | 0,25         |
| 17             | 45               | 0,08                | 1,5           | 16           | 383,33           | 1062,79      | 69,74        | 0,05         | 0,39         |
| 18             | 145              | 0,08                | 1,5           | 16           | 336,11           | 749,7        | 74,25        | 0,08         | 0,33         |
| 19             | 95               | 0,02                | 1,5           | 16           | 266,99           | 505,24       | 66,23        | 0,093        | 0,44         |
| 20             | 95               | 0,14                | 1,5           | 16           | 490,79           | 997          | 91,55        | 0,139        | 0,59         |
| 21             | 95               | 0,08                | 0,5           | 16           | 399,81           | 1039,63      | 70,95        | 0,065        | 0,33         |
| 22             | 95               | 0,08                | 2,5           | 16           | 333,98           | 1108,77      | 95,68        | 0,048        | 0,14         |
| 23             | 95               | 0,08                | 1,5           | 4            | 332,48           | 1019         | 72           | 0,02         | 0,34         |
| 24             | 95               | 0,08                | 1,5           | 28           | 471,54           | 1195,5       | 115,34       | 0,14         | 0,49         |
| 25             | 95               | 0,08                | 1,5           | 16           | 363,33           | 1075         | 83,33        | 0,06         | 0,2          |
| 26             | 95               | 0,08                | 1,5           | 16           | 359,26           | 1069         | 85,26        | 0,065        | 0,25         |
| 27             | 95               | 0,08                | 1,5           | 16           | 371,25           | 1068,58      | 84,23        | 0,059        | 0,26         |
| 28             | 95               | 0,08                | 1,5           | 16           | 366,21           | 1085,15      | 83,19        | 0,05         | 0,19         |
| 29             | 95               | 0,08                | 1,5           | 16           | 362,55           | 1071,25      | 79,95        | 0,049        | 0,22         |
| 30             | 95               | 0,08                | 1,5           | 16           | 368,52           | 1073,24      | 81,25        | 0,06         | 0,19         |
